# Supplementary material
Source: PubMed Central journal article supplement (PMC7612771)
Supplement: EMS145166-supplement-Appendix.pdf [file EMS145166-supplement-Appendix.pdf]

Appendix A. Relationship between the intensity of sanitation logging and amounts of extracted and retained spruce trees

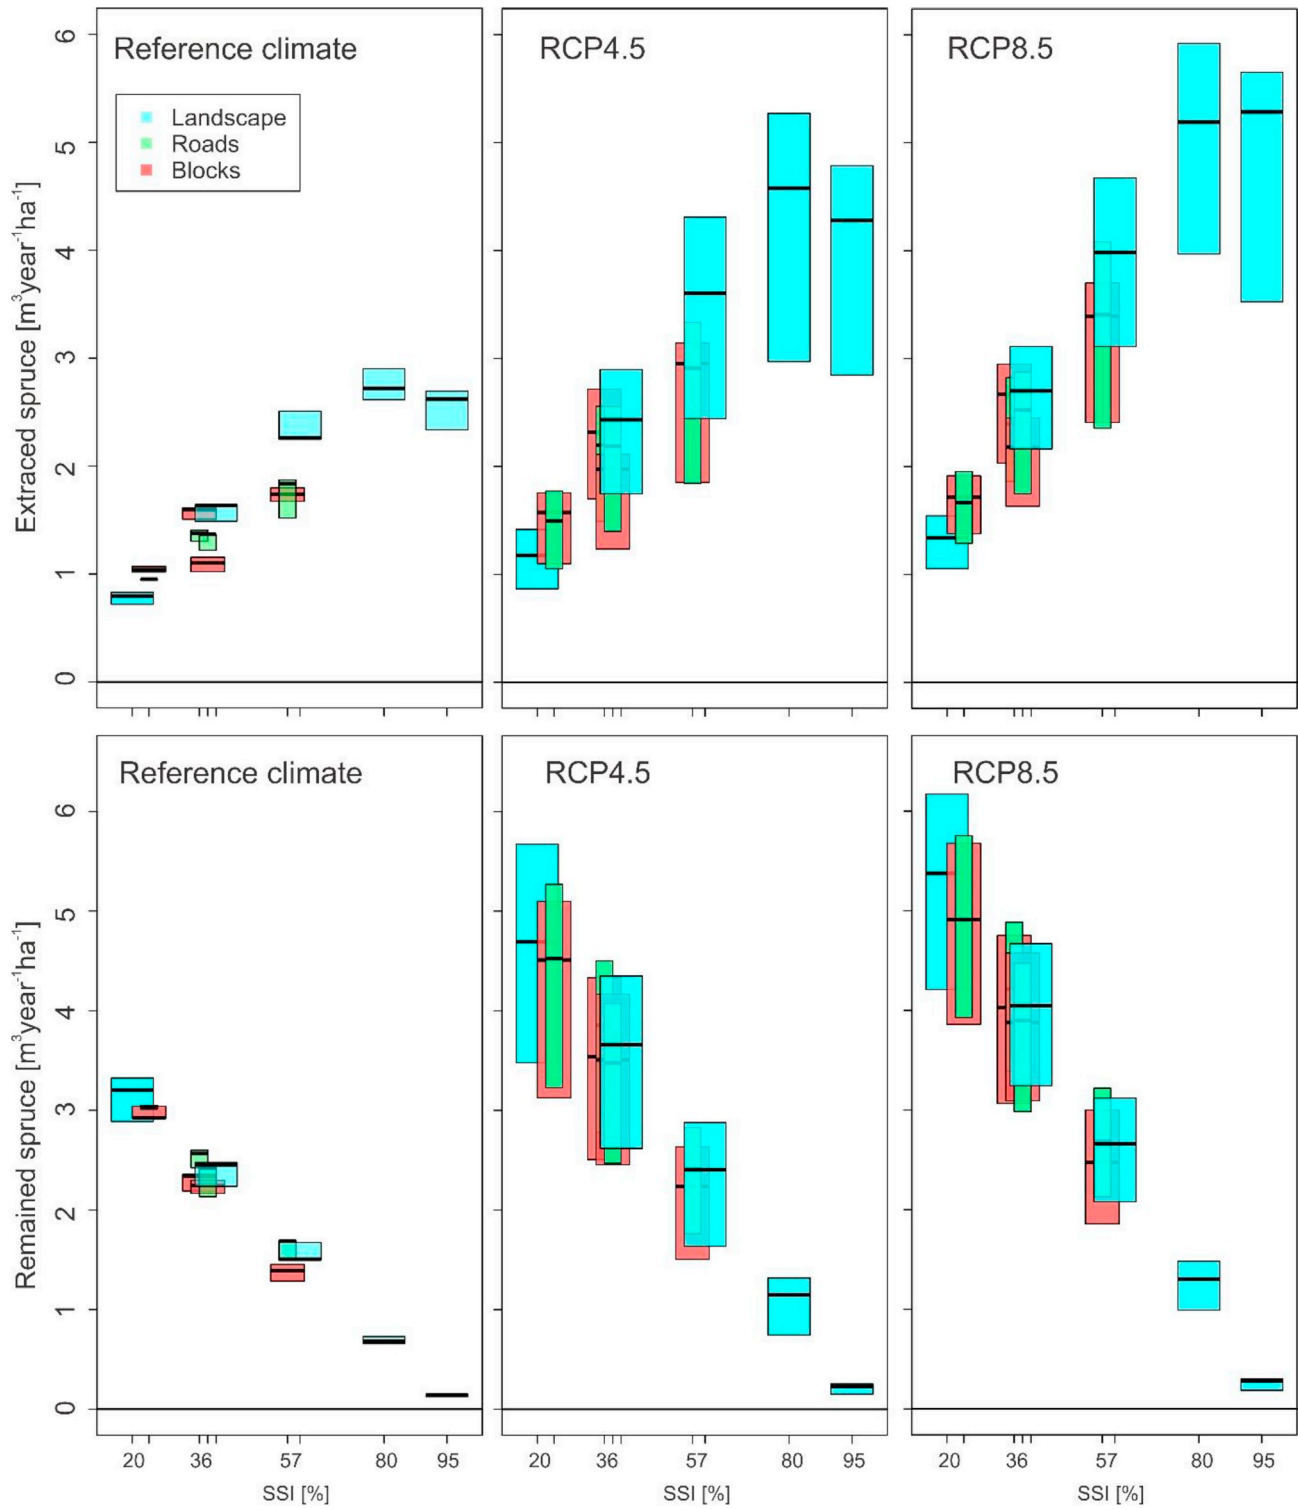

Fig. A1. The average extracted and remained volume of spruce trees affected by wind and bark beetles during the simulation period for different SSI-s under three climate conditions

Appendix B. Selected indicators of simulated forest development affected by wind and bark beetle disturbance

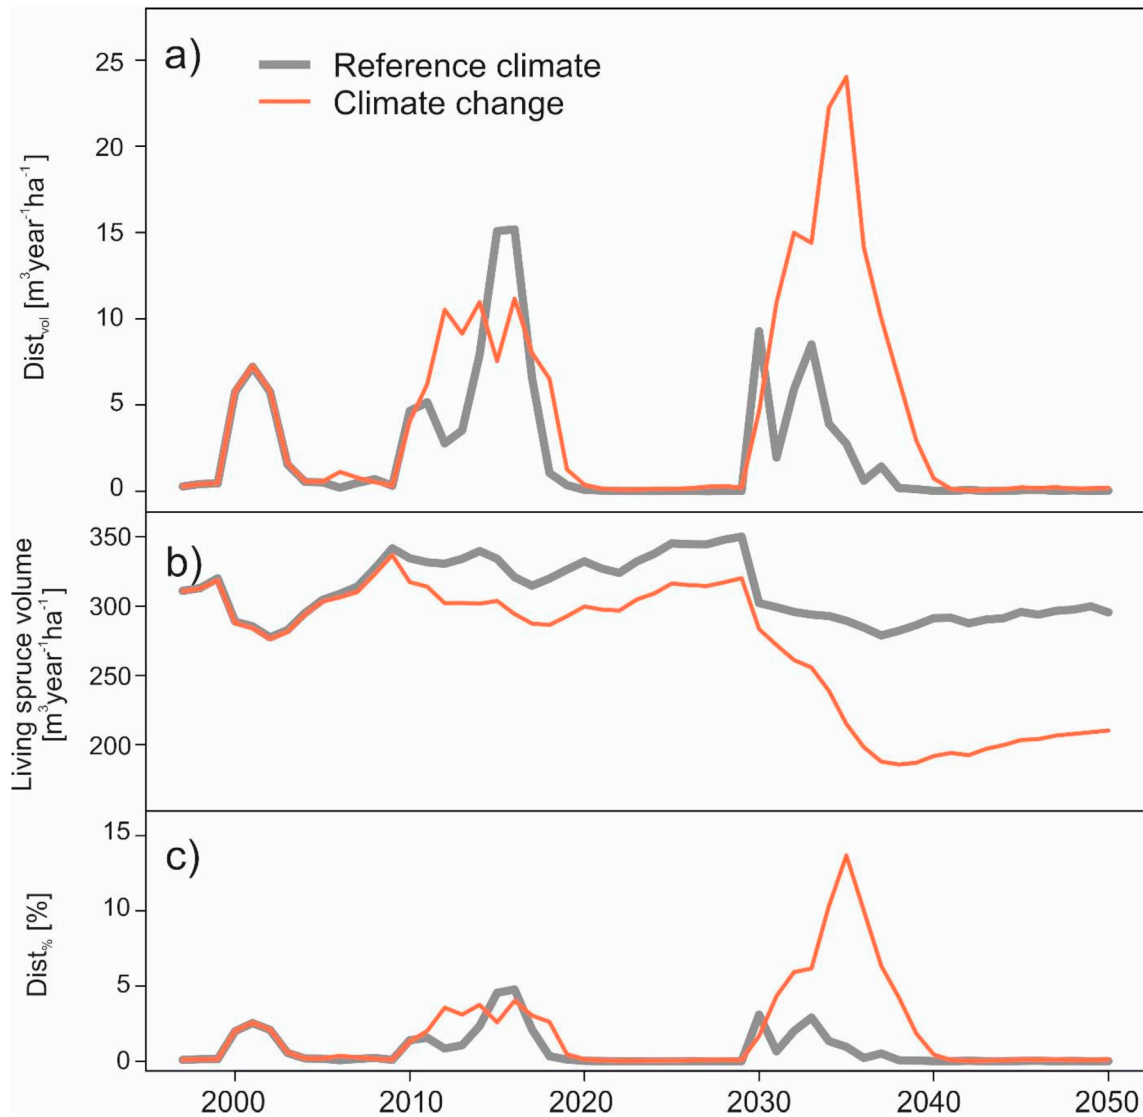

Fig. B1. Wood volume affected by bark beetles (a), volume of live spruce trees (b) and the percentage of bark beetle affected volume (c). Values without sanitation logging are shown.

Appendix. CSupplementary data

Supplementary data to this article can be found online at <https://doi.org/10.1016/j.jenvman.2019.109792>.
